# Hyperosmotic treatment synergistically boost efficiency of cell-permeable peptides

Hu Wang<sup>1,2,4</sup>, Ming Zhang<sup>1,2</sup>, Fanhui Zeng<sup>3</sup>, Changbai Liu<sup>1,2,4</sup>

<sup>1</sup>The Institute of Cell Therapy, China Three Gorges University, Yichang, China

<sup>2</sup>Medical School, Department of Pathology, Biology and Immunology, China Three Gorges University, Yichang, China

<sup>3</sup>The Central Hospital of Enshi Tujia and Miao Autonomous Prefecture, Enshi, China

<sup>4</sup>Hubei Key Laboratory of Tumor Microenvironment and Immunotherapy, China Three Gorges University, Yichang, China

**Correspondence to:** Hu Wang, **email:** biomed\_wang@yahoo.com  
Changbai Liu, **email:** cbliu@ctgu.edu.cn

**Keywords:** cell penetrating peptide, hypertonic molecules, penetration, osmoprotectant

**Received:** February 25, 2016

**Accepted:** April 11, 2016

**Published:** May 18, 2016

## ABSTRACT

Therapeutics delivery into cells has been hurdled due to the barrier of cytoplasmic membrane. Although cell penetrating peptide (CPP) can potentially serve as an intracellular drug delivery vehicle, the application of CPP-based delivery is limited because the unsatisfactory delivery efficiency of CPP conjugated potent cargos is challenging their applications in present. Thus, the development of strategies for enhancing the penetrating efficiency of CPP would therefore urgent need to be explored to increase the scope of potential applications. We report here the effects of glucose, sucrose and mannitol (abbreviated as GSM) combination facilitating the penetration efficiency of CPP peptide alone or CPP-GFP (green fluorescence protein) conjugation in cultured cell lines or primary cells. Moreover, osmoprotectants glycerol and glycine supplementation help cells cope with the stress from GSM combination. Thus, our present study suggests that GSM combination in the presence of osmoprotectant can work as a new strategy for CPP penetration enhancement.

## INTRODUCTION

Macromolecules including nucleic acids (e.g. mRNA, siRNA, microRNA and lncRNA) and proteins (e.g. enzymes, cytokines and antibodies) have demonstrated great value as research tools and achieved widespread success as human therapeutics among the fastest growing classes of drugs [1, 2]. However, many powerful and potentially therapeutic proteins are typically not able to spontaneously enter into mammalian cells owing to the selectively permeable barrier of cellular membrane. To address this challenge, variety of macromolecule delivery approaches or reagents have been developed. Perhaps cell-penetrating peptide (CPP)-based delivery system is the most common and safe method for the introduction of exogenous macromolecule to transiently manipulate cell behavior without possibility of permanent genomic changes [3].

Examples of CPP also called protein transduction domains (PTD), because it can mediate the uptake of cargos that are covalently or non-covalently linked to them. Many CPPs have been discovered or applied during

the past few decades, such as the TAT (human HIV-1 transactivator of transcription protein, residues 48–60), which have successfully delivered small molecules, peptides or proteins, nucleic acids, quantum dots (QDs), polysaccharides, liposomes and nanoparticles *in vitro* or *in vivo* [4]. Although TAT-mediated cargo delivery appears to work with almost all mammalian cells (from stem cells [5–8] to somatic cells [9, 10]) independent of tissue or organism types, insects and even plant cells, the unsatisfactory delivery efficiency of TAT or CPP conjugated potent cargos is challenging their applications at the clinical trial stage. Thus, the development of strategies for enhancing the penetrating efficiency of CPP would therefore urgent need to be explored to increase the scope of potential applications. Our group has discovered and successfully employed small molecule DMSO (dimethyl sulfoxide) [11] and BIT (1,2-benzisothiazolin-3-one) [12] to facilitate the penetrating efficiency of TAT or TAT fused conjugates for a range of cell types, however, the unknown mechanism of enhancement and their potential side effects in high concentration may affect their application in clinic.

Reports have shown that hypertonic molecules (e.g. sucrose and NaCl) treatment drives the highly efficient intracellular uptake of native proteins and other macromolecules into cells [13], and lysosomotropic agents, such as chloroquine and sucrose have been used in CPP penetration to improve the efficiency of cargo delivery [11, 14], however, whether other agents such as glucose and mannitol as hypertonic molecules can enhance the penetration efficiency of CPP remain unknown. Here, we describe glucose and mannitol both enhance the penetrating efficiency of CPP, and we also found that glucose, sucrose and mannitol (abbreviated as GSM) can synergistically accelerate CPP entering into a wide variety of cell lines and primary cells. And osmoprotectants glycine and glycerol supplementation resulted in minimal effect on cell proliferation of different cell lines. Thus, we demonstrate that the system of CPP in hypertonic medium combined with osmoprotectants allows the highly efficient delivery of protein cargos.

## RESULTS

### The enhancement effect of GSM on TAT penetration

A series of previous studies suggested that the suitable concentration of agents (chloroquine and sucrose) can promote the endosome-entrapped material release [15–17], thus, *in-vitro*-cultured cells incubated with sucrose can serve as an alternative strategy to enhance the drug delivery. To further examine the enhancement effect of sucrose on the penetration of TAT, we detected the intracellular distribution of TAT using fluorescence microscope, as shown in Figure 1A, TAT-FITC was well-distributed in the cytosol of HeLa cells incubated with sucrose (500 mM), it seems like that enhancement effect of chloroquine with different concentration is limited (Supplementary Figure S1), and we also detected intracellular distribution of TAT-FITC in different cells (Caski, A549, HepG2 and Siha) incubated with sucrose (500 mM) at 37°C for 1 h, as well as in Siha cells at 4°C (Figure 1B). These results suggest that suitable concentration of sucrose can be used to increase the penetration of TAT in different cell lines. Previous studies have shown that hypertonicity-inducing molecules (NaCl, RbCl, KCl and LiCl) could mediate protein delivery [13], and sucrose can enhance the DNA transfection as well [15], however, it is still unknown whether other hypertonicity-inducing agent including mannitol have similar effects. Therefore, we also examined the effect of glucose and mannitol on TAT penetration. In Figure 2A, the markedly TAT penetration enhancement was observed in Caski cells incubated with glucose and mannitol at 500 mM, and the dose ranging (from 200 to 600 mM) of glucose and mannitol experiments were also performed for quantitative analysis (Figure 2B), we discovered that TAT

penetration enhancement in Caski cells was dependent on the concentration of glucose, sucrose and mannitol. Moreover, we explored the effect of different cell lines on TAT penetration in the presence of glucose and mannitol (Figure 2C), indicating that glucose and mannitol also can enhance the penetration of TAT uptake by different cell lines. In addition, galactose treatment also can partially enhance the penetration efficiency of TAT (Supplementary Figure S2A); however, the enhancement effect resulting from galactose treatment is lower than induction by mannitol (Supplementary Figure S2B).

### The combined effect of GSM on TAT penetration

The above experiments suggest that TAT penetration efficiency was enhanced after glucose, sucrose and mannitol treatment. Next, we examined the TAT penetration efficiency in Caski cells incubated with glucose, sucrose and mannitol (abbreviated as GSM) combination. As shown in Figure 3A, TAT-FITC uptake by Caski cells was improved by glucose and sucrose combination, glucose and mannitol combination (Figure 3B) and sucrose and mannitol combination (Figure 3C). We also evaluated the combination effect of GSM. As expected, Figure 3D showed that GSM combination treatment lead to TAT-FITC uptake increasing as the concentration gradient, and Figure 3E shows an image of TAT penetration in Caski cells treated by GSM combination, and there was no difference between PBS washing and 0.025% trypsin washing method (Supplementary Figure S3). Thus, these data indicated co-incubation with GSM have combination effect.

### Protective of glycerol and glycine cotreatment

Although GSM combination promoted TAT-FITC penetration, cell survival may be affected by high concentration of sucrose and mannitol because they can act as an osmotic [18]. However, recent report suggested that osmoprotectants such as glycerol and glycine can be used to help cells survive by balancing the osmotic effect [13]. Thus, we examined whether glycerol (30 mM) and glycine (15 mM) addition in media could prevent the hypertonicity induced the cell proliferation inhibition, without glycerol and glycine supplementation, Caski cells incubated with GSM separately or combination reduced the cell proliferation compared with control, however, glycerol and glycine addition during the GSM treatment can rescue the cell viability at 24 h (Figure 4A), 48 h (Figure 4B) as well as 72 h (Figure 4C), and still allowing the TAT penetration. We next investigated whether glycerol and glycine could potentially affect the TAT-FITC penetration ability as well, as shown in Figure 4D, TAT-FITC penetration efficiency was not observed in the presence of glycerol and glycine. These data demonstrate that glycerol and glycine only act as osmoprotectants but

no significant penetration enhancing activity. Therefore, in the subsequent experiments, glycerol and glycine were added in the media for further analysis.

### Enhancement of TAT penetration by GSM combination in multiple cell types

To determine GSM combination efficiency in different cell types, we investigated GSM combination treatment in cultured cell lines as well as primary cultured cells. In Figure 5A, such combination treatment could potentially increase the FITC-labeled TAT uptake in different cancer cell lines *in vitro*. Figure 5B shows an image of TAT-FITC uptake in primary cultured Sertoli cells, and the fluorescence quantitative evaluation provide similar results to the microscopy (Figure 5C), demonstrating that GSM combination is still effective in both cell lines and primary cells.

### Enhancement of different CPPs penetration by GSM combination

To explore whether GSM combination could enhance different kinds of CPPs including dTAT (tandem repeats of TAT), NLS and hPP10 (newly found human-derived

CPP), Caski and HepG2 cells with TAT-FITC co-incubated with GSM were evaluated. As shown, GSM combination resulted in increased intracellular fluorescence intensity of TAT-FITC of Caski cells (Figure 6A) and HepG2 cells (Figure 6B). Altogether, these data demonstrate that GSM combination can facilitate the penetration efficiency of different kinds of CPPs.

### GSM combination does not affect TAT internalization pathway

Although the exact intracellular delivery mechanism of TAT remains elusive, we know that serum, temperature and endocytic inhibitors (such as sodium azide and ammonium chloride) affect the transduction level of TAT. To determine whether GSM combination affect the internalization pathway, we initially examined the TAT penetration efficiency in Caski cells cultured with or without 10% fetal bovine serum (FBS). TAT penetration efficiency remains decreased in FBS supplement group (Figure 7A) even in GSM combination. Next, we analyzed TAT penetration efficiency at different temperatures, the efficiency of TAT penetration decreased at lower temperatures (Figure 7B). In addition, we explored the effect of two inhibitors, including metabolic inhibitor  $\text{NaN}_3$ ,

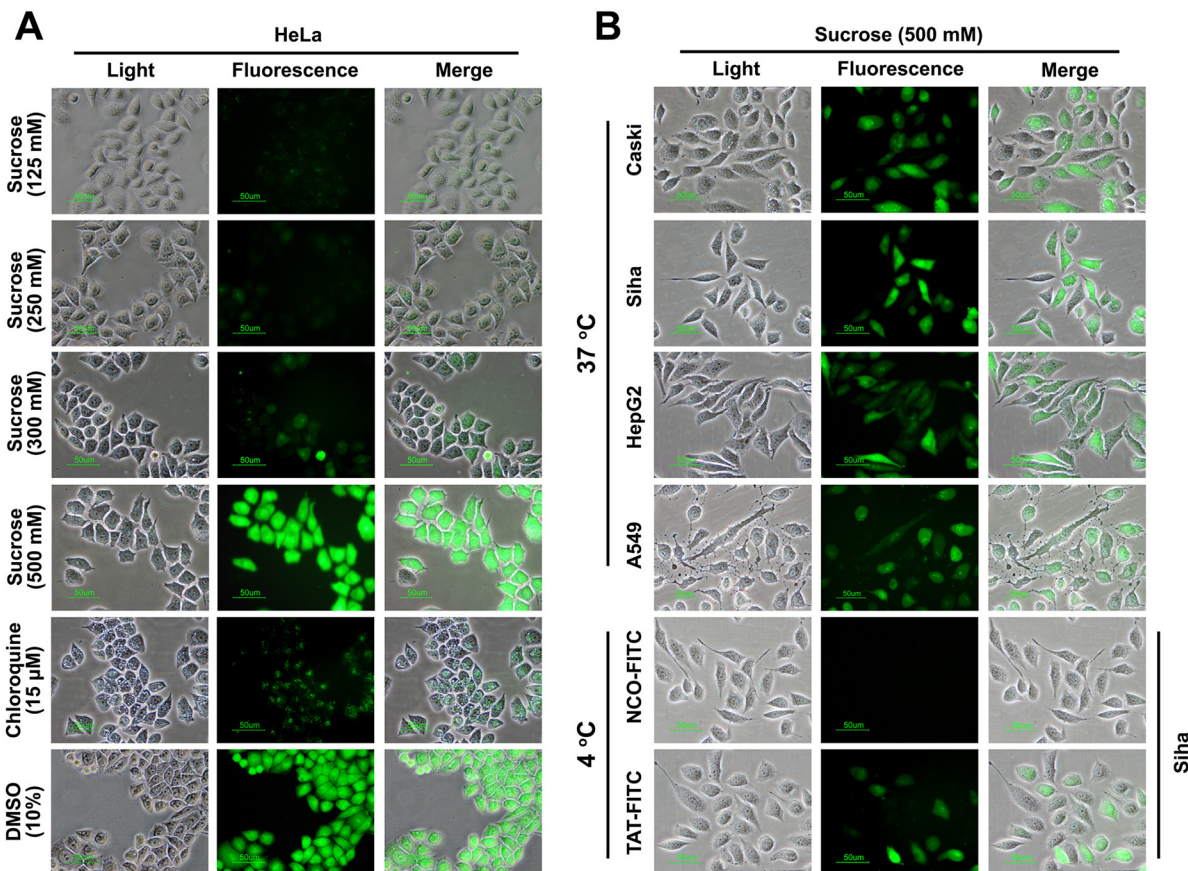

**Figure 1: The penetrating efficiency of TAT can be enhanced by suitable concentration of sucrose, glucose as well as mannitiol.** (A) Intracellular distribution of TAT-FITC detected by fluorescence microscopy. Chloroquine and DMSO treatment were used as control. (B) The subcellular distribution of TAT-FITC in different cell lines incubated with sucrose (500 μM) at 37°C or at 4°C.

(Figure 7C) and lysosomotropic neutralizing agent  $\text{NH}_4\text{Cl}$  (Figure 7D) on TAT penetration efficiency. The intracellular delivery efficiency of TAT-FITC was significantly decreased in the presence of GSM combination treatment. Collectively, our results demonstrate that GSM combination does not affect TAT internalization pathway.

## TAT-GFP fusion protein uptake enhanced by GSM combination

The above data demonstrate that GSM combination can be utilized to enhance the penetration efficiency of CPPs, however, it is extensively recognized that the

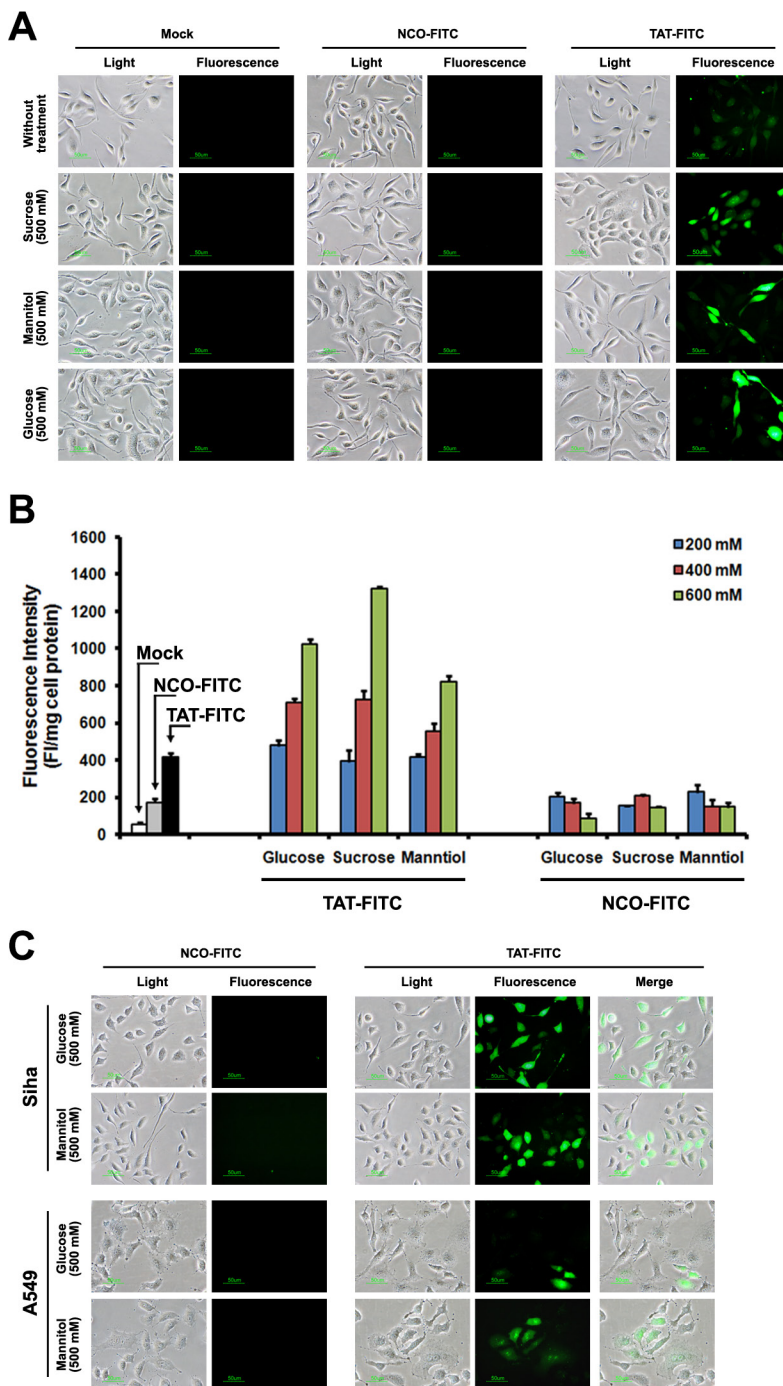

**Figure 2: TAT-FITC uptake by different cells treated with sucrose, glucose and mannitol.** (A) Caski cells were incubated with glucose, sucrose and mannitol (500 mM) for 1 h, and then treated with TAT-FITC for 1 h at 37°C. Fluorescence images were observed using fluorescence microscope. (B) Quantitative analysis of FITC-labeled TAT uptake by Caski cells incubated with different concentration of glucose, sucrose and mannitol. (C) Fluorescence images of TAT-FITC uptake by A549 and Siha cells incubated with glucose and mannitol.

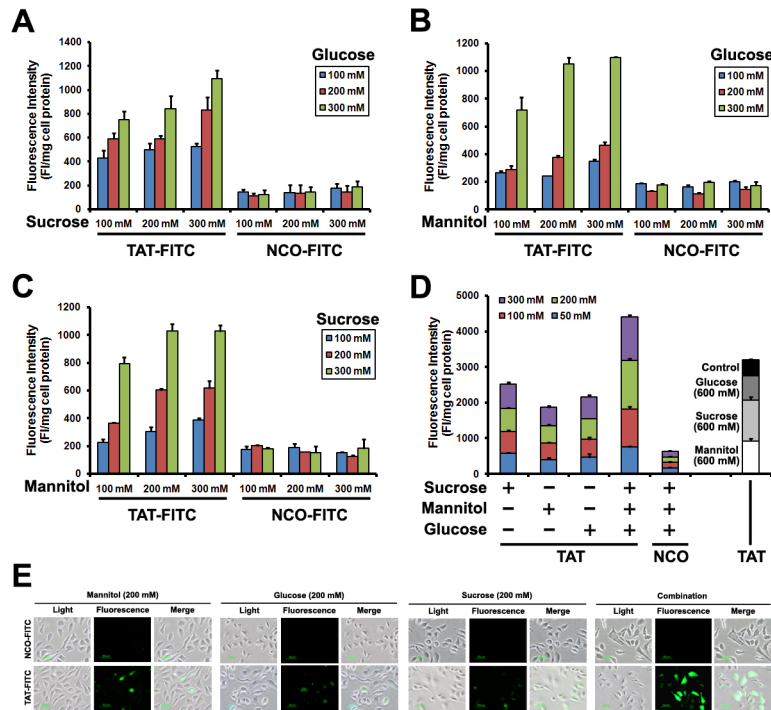

**Figure 3: Quantitative analysis of Caski cells showing TAT-FITC penetration enhanced by co-incubation with glucose, sucrose and mannitol.** (A) Caski cells were co-incubated with glucose and sucrose (from 100 to 300 mM) for 1 h, and then treated with TAT-FITC for 1 h at 37°C. NCO-FITC group were used as negative control. (B) Caski cells were co-incubated with glucose and mannitol (from 100 to 300 mM) for 1 h, and then treated with TAT-FITC for 1 h at 37°C. (C) Caski cells were co-incubated with sucrose and mannitol (from 100 to 300 mM) for 1 h, and then treated with TAT-FITC for 1 h at 37°C. (D) Caski cells were co-incubated with glucose, sucrose and mannitol (from 50 to 300 mM) for 1 h, and then treated with TAT-FITC for 1 h at 37°C. TAT-FITC group incubated with glucose, sucrose and mannitol (600 mM) separately were used as control.

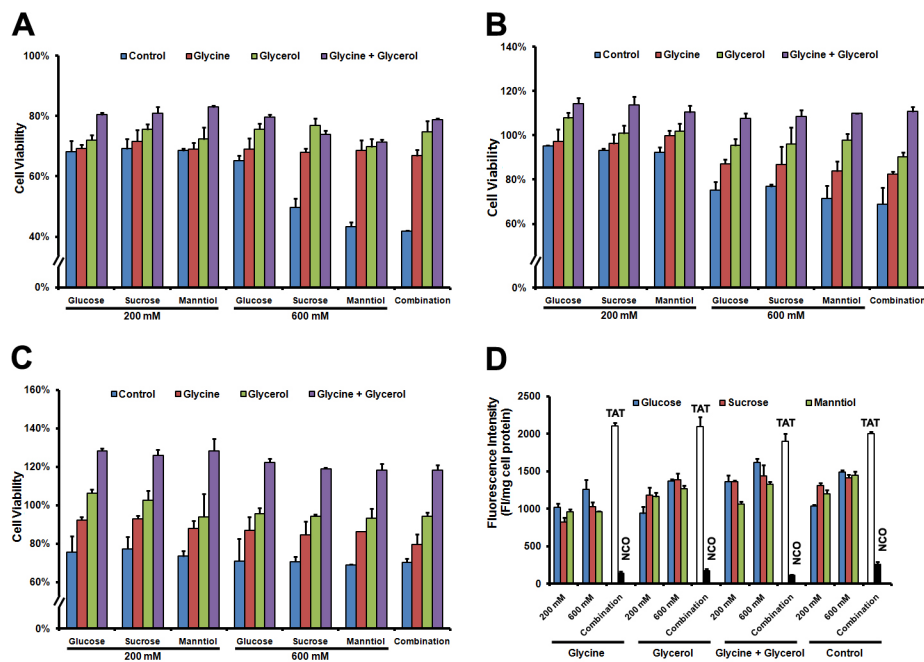

**Figure 4: Cell viability of Caski cells rescued by glycerol and glycine combination.** (A) Caski cells were incubated glucose, sucrose and mannitol combination or separately as well as supplement with glycerol and glycine for 1 h at 37°C, discarding the supernatant of culture, washed with PBS 3 times, and then cultured for 24 h, cell viability was detected following the MTT protocol. (B) Cell viability was detected after 48 h culture with fresh medium; (C) Cell viability was detected after 72 h culture in fresh medium; (D) Quantitative analysis of FITC-labeled TAT uptaken by Caski cells incubated with glycerol and glycine combination or separately.

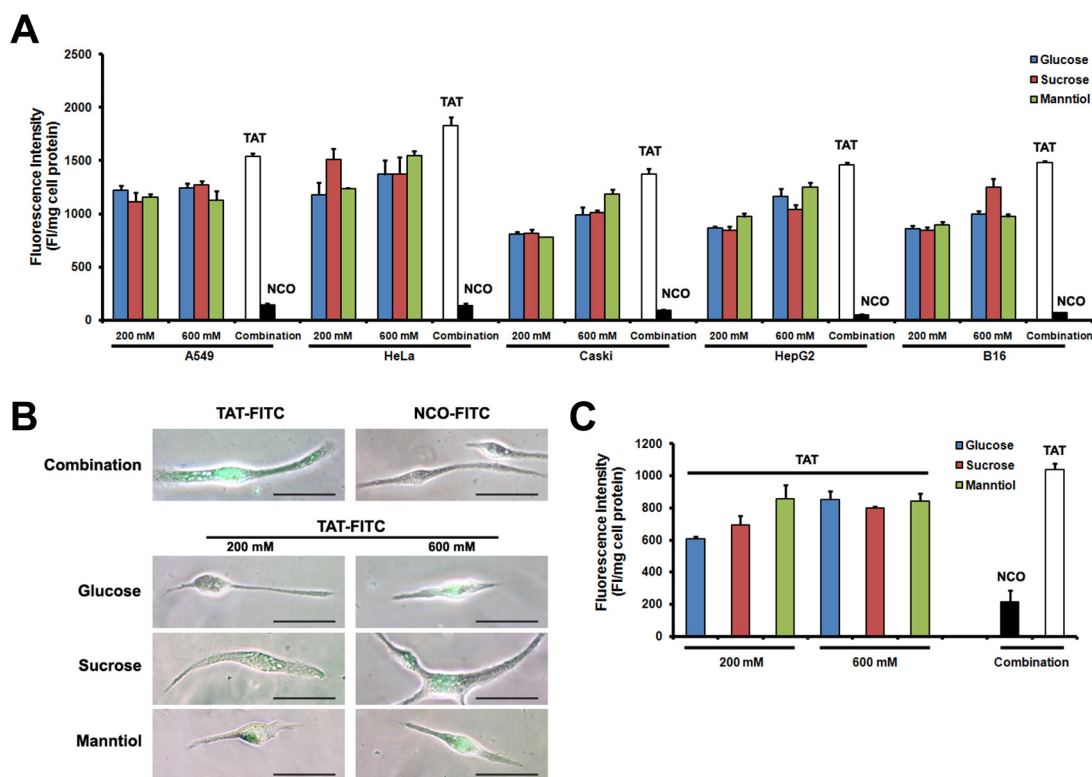

**Figure 5: TAT-FITC uptake by cultured cells and primary cells treated with glucose, sucrose and mannitol combination.** (A) Different cell lines were co-incubated with glucose, sucrose and mannitol (200 mM) for 1 h, and then treated with TAT-FITC for 1 h at 37°C. Quantitative analysis of FITC-labeled TAT uptake was measured. (B) Fluorescence images of TAT-FITC uptake by Sertoli cells incubated with glucose, sucrose and mannitol separately as well as combination. (C) Quantitative analysis of FITC-labeled TAT uptake by Sertoli cells incubated with the combination of glucose, sucrose and mannitol.

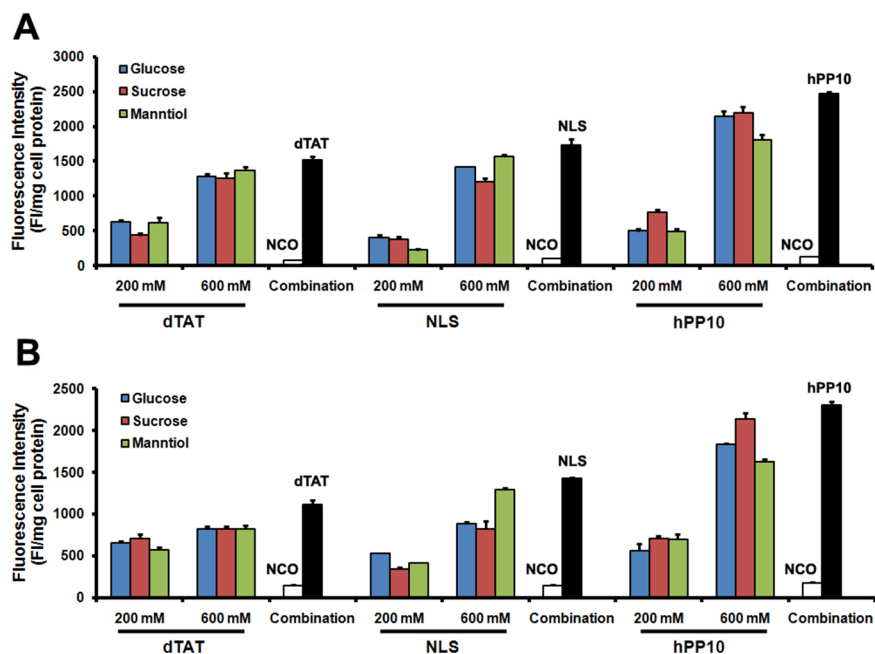

**Figure 6: Different FITC-labeled peptides penetration in Caski and HepG2 cells.** (A) Quantitative analysis of dTAT-FITC, NLS-FITC and hPP10-FITC in Caski cells co-incubated with glucose, sucrose and mannitol. (B) Quantitative analysis of dTAT-FITC, NLS-FITC and hPP10-FITC in HepG2 cells co-incubated with glucose, sucrose and mannitol.

uptake levels are related to the cargo sizes, and poor efficiency of CPPs fused to cargoes such as TAT-GFP crossing cells membrane were observed in different cell types (Supplementary Figure S4A), even in the presence of chloroquine (Supplementary Figure S4B) with different conditions. To further determine whether GSM combination treatment allows the penetration efficiency enhancement of TAT conjugated with fusion protein as well, we use TAT-GFP fusion protein as a direct detection system to quantify penetration efficiency. Following the incubation of GSM alone or combination for 1 h, fluorescence microscopy revealed that the enhancement of TAT-GFP penetration efficiency in GSM combination was more significant than the GSM alone in L929 and B16 cells (Figure 8A), similar result from fluorescence quantification of TAT-GFP uptake was measured in L929, B16 and Caski cells (Figure 8B). Thus, GSM combination treatment not only can enhance the penetration efficiency of TAT peptide, but also could potentially enhance the penetration of TAT-GFP fusion protein.

## DISCUSSION

Cell-penetrating peptides (CPP) are capable of delivering therapeutic cargo into live cells under physiological conditions and have been widely used for

protein-based delivery [19]. Although CPP-based protein transduction appears to have enormous potential in the clinic, challenges for CPP-based delivery poses problems to the application due to the low effective cellular uptake efficiency. To our knowledge, osmotic gradient across the cell membrane could be caused by sucrose treatment, and hypertonic treatment using sucrose was used to promote endosome release of endosome-entrapped material [15, 16]. Here, we have introduced that other hypertonic molecules including mannitol as well as sucrose could be used to enhance the penetration efficiency of CPP, and GSM combination in certain concentration (200 mM) facilitate the CPP alone or CPP conjugated cargo penetration highly in cultured cell lines and primary cells compared with GSM treatment separately. Moreover, glycerol and glycine co-treatment could alleviate the proliferation inhibition of GSM combination. Indeed, hypertonic solutions containing sucrose, glucose and mannitol were used in the treatment of cerebral edema for osmotic therapy [18].

Although the previous study suggested that hypertonic shock can be used to enhance the cargo delivery, from the present study, hypertonic treatment without recovery period still can facilitate the CPP-based cargo delivery. Next, glucose, sucrose as well as mannitol can be modified by some groups so as to

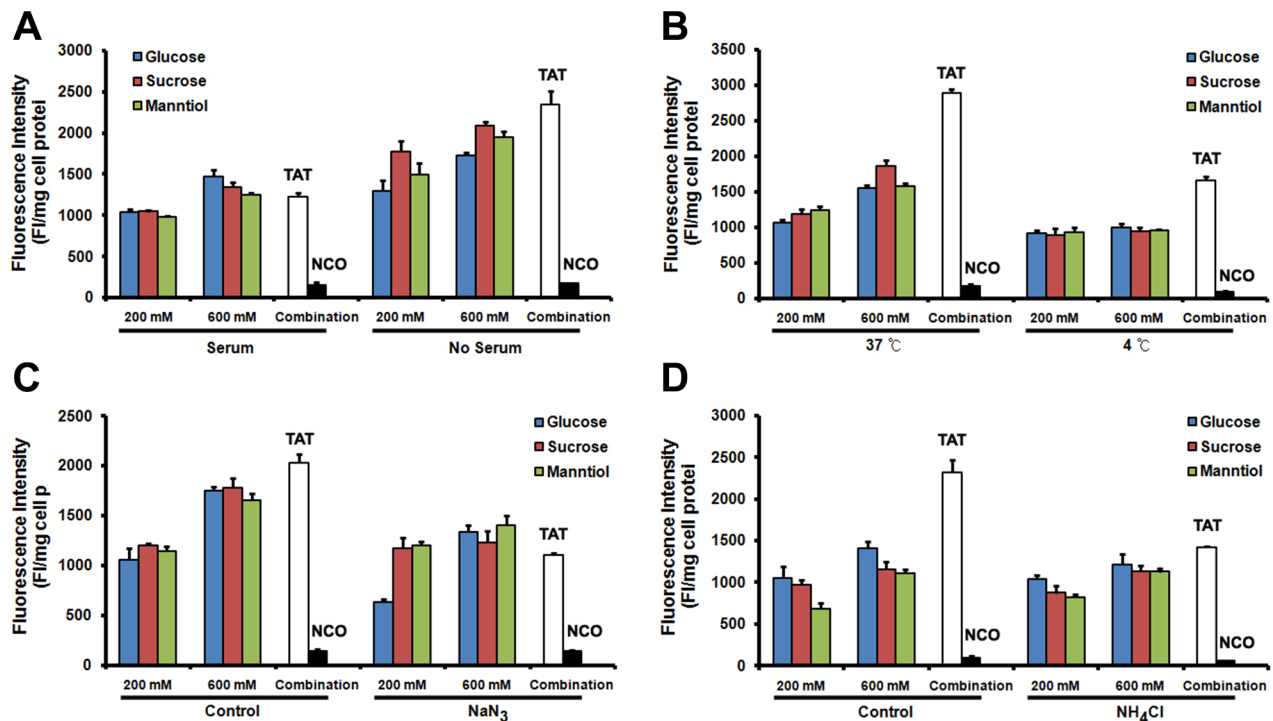

**Figure 7: The mechanism of TAT-FITC penetration in Caski cell is not affected by glucose, sucrose and mannitol combination.** (A) Compared with none serum medium, serum contained medium incubation inhibit the combination effect of glucose, sucrose and mannitol. (B) Quantitative analysis of TAT-FITC in Caski cells co-incubated with glucose, sucrose and mannitol at 4 and 37°C. (C) Quantitative analysis of TAT-FITC in Caski cells co-incubated with glucose, sucrose and mannitol with or without the presence of sodium azide. (D) Quantitative analysis of TAT-FITC in Caski cells co-incubated with glucose, sucrose and mannitol with or without the presence of ammonium chloride.

improve the stability of these molecules which will be very helpful for *in vivo* usage. Previous studies have reported that sucrose can be used to help the CPP-cargo release from the endosome, thus, we conclude that glucose, sucrose and mannitol may also through the endosome release promotion to enhance the penetration of CPP. Secondly, ion channels are very important for cell survival as well as for small molecules delivery, more important, different ion channels' activity may vary in different cells, whether the different enhancement effect of GSM combination due to different cells is still unknown, and whether the ion channels play a role in

the enhancement by GSM combination treatment is still unknown. However, the non-CPP conjugated cargo releasing are much lower than CPP, thus leading to the GSM combination enhance the CPP-cargo delivery higher than non-CPP based delivery.

GSM combination can significantly improve the penetration efficiency of CPP in the presence of glycerol and glycine, although the exact mechanism of enhancement still needs to be investigated in the further research. Our present research may lay a foundation to CPP-based bio-therapy for brain tumor patient with symptoms of intracranial hypertension.

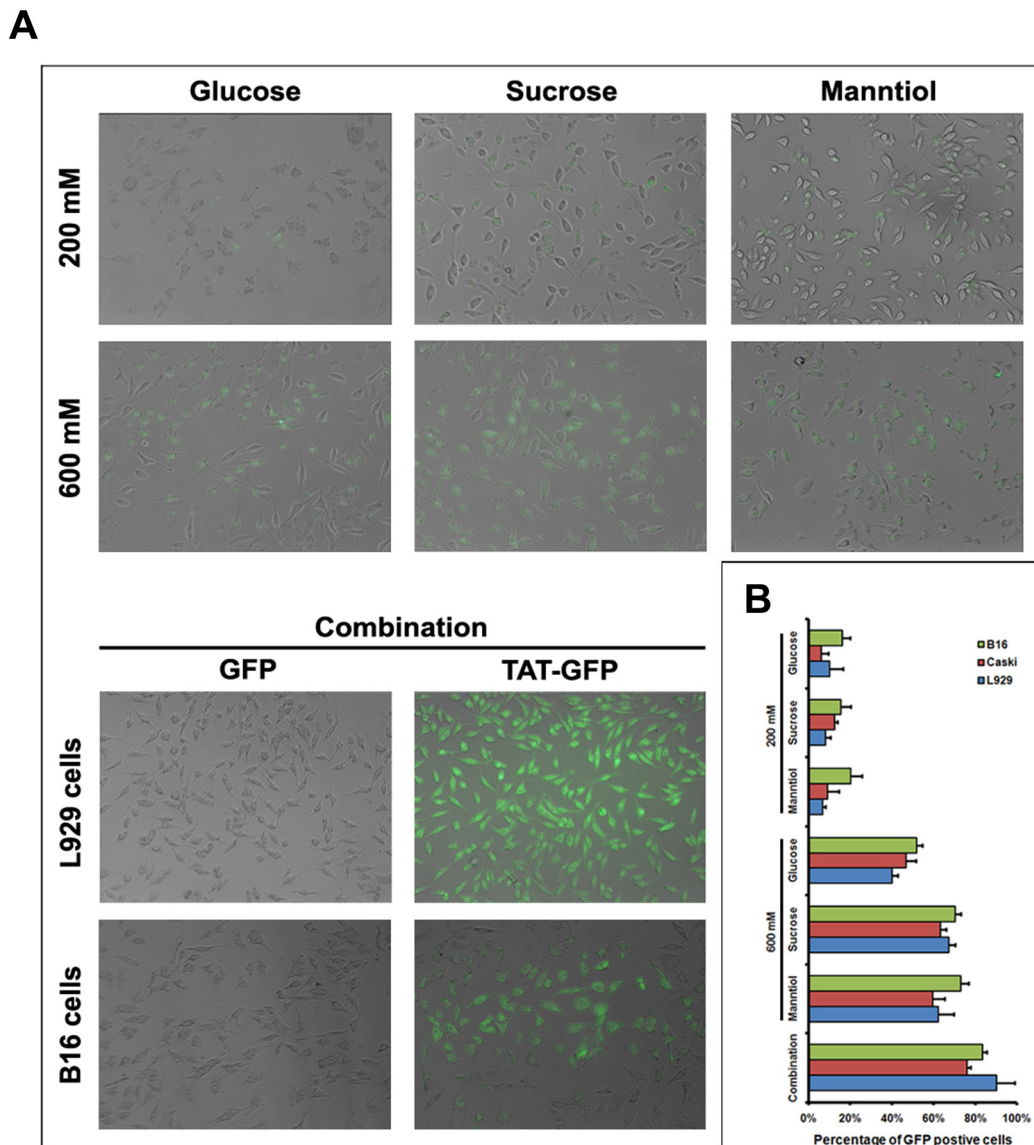

**Figure 8: TAT-GFP fusion protein penetration enhanced by glucose, sucrose and mannitol combination.** (A) Fluorescence images of TAT-GFP uptake by B16 and L929 cell incubated with glucose, sucrose and mannitol separately as well as combination. The top layer of image of transduced cells was L929 cell. (B) Quantitative analysis of TAT-GFP uptake by Caski, B16 and L929 cell incubated with glucose, sucrose and mannitol separately as well as combination.



## MATERIALS AND METHODS

### Reagents and drugs

NaN<sub>3</sub>, heparin and NH<sub>4</sub>Cl were purchased from Shandong Wanbang Biochem Co. Ltd (Shandong, China). Chloroquine diphosphate salt was provided by HongJing Chem Co. Ltd (Hubei, China). Trypsin was supplied by Sigma-Aldrich (USA) and dimethyl sulfoxide (DMSO) was obtained from Sigma.

### Cell lines and cell culture

HeLa, Siha and Caski (human cervical cancer cell line), A549 (human nonsmall cell lung cancer cell line), B16 (mouse melanoma cell line), HepG2 (human hepatocellular carcinoma cell line) were maintained in our laboratory. All cells were maintained in RPMI 1640 medium supplemented with 10% FBS and 1% penicillin/streptomycin, and were cultured at 37°C in a humidified atmosphere containing 5% CO<sub>2</sub>.

### Sertoli cell isolation, purification and culture

All mice were got from government approved animal facility at China Three Gorges University. All experimental protocols were reviewed and approved by the China Three Gorges University Institutional Animal Care and Use Committee. All efforts were done to minimise animal suffering, the mice were deeply anesthetized with ether and then sacrificed by cervical dislocation to collect the testes. Sertoli cells were isolated from CD1 mice following the protocol previously described [20–22]. As Sertoli cells from mature male mouse cannot be cultured very well, 4 testes from 10 days postnatal males were collected and placed in PBS, decapsulated with scissors, cut into small fragments and digested in 0.05% trypsin for 10 min shaking at 37°C in water bath to remove the interstitium. The resultant seminiferous tubule fragments were collected and then washed with PBS followed by further 0.05% trypsin digestion under the same conditions for 10 min. The disaggregated samples were filtered using a 70 µm filter and then centrifuged at 800 g for 10 min. The mixed population of testes cells obtained were resuspended in culture medium (DMEM supplement with 10% FBS plus 100 U/ml penicillin and 100 µg/ml streptomycin), then plated on gelatin coated dishes and incubated for 1 h at 37°C in a humidified atmosphere of 5% CO<sub>2</sub>. After the incubation, non-adhering cells were removed by washing twice with culture medium. The attached cells are mainly Sertoli cells which will be cultured for 7–10 days and then used for penetration experiment following the protocol described below.

### FITC-labeled peptides synthesis and fusion protein expression

Peptides TAT (sequence: YGRKKRRQRRRK), NCO (a nonsense peptide, sequence: KALGISYGRKK), NLS (sequence: RKDRRGEMMKQKRQRE), dTAT (tandem repeat of TAT) and hPP10 (sequence: KIPLPRFKLKCIFCKRRKR) labeled with FITC were synthesized from SBS Genetech (Beijing, China). These peptides were purified using reversed phase analytical HPLC (more than 99 % purity), diluted to 500 mM and stored at –20°C for further use. TAT-GFP and GFP protein were prepared following the protocol described [11, 12], fusion proteins were expressed in the BL21 (DE3) strain of *E. coli*, and 6-His-tagged target proteins were purified by affinity chromatography using Ni-NTA resins.

### Peptide internalization

#### Fluorescent microscopy

TAT-FITC treated cells were observed under a fluorescence microscope. HeLa, Siha, Caski, HepG2, A549 or B16 cells (density:  $5 \times 10^5$  cells per well) were seeded into 24-well-plates (Greiner, Germany) and cultivated in RPMI-1640 medium for 24 h. Before the 10 µM FITC-labeled peptides addition, cells were washed with phosphate-buffered saline (0.1 M PBS, pH 7.4) for 3 times. After internalization for 1 h at 37°C, cells were washed 3 times with PBS, and then observed under fluorescence microscope (Nikon, Japan) using a bandpass filter (detects FITC). In some experiments, cell was pretreated with 5% (v/v %) of DMSO in serum-free medium.

#### Fluorescent quantitation

Intracellular fluorescence intensity of cells can be quantified using quantitative analysis by Multimode Spectrophotometry (Tecan 2000, Mannedorf, Switzerland). Briefly, after peptide incubation procedure shown above, cells were washed 3 times with PBS, lysed by 0.1 M NaOH at room temperature, and then centrifuged at 14000 g for 5 min. The fluorescence intensity of the supernatant was measured at the wavelength of 494/518 nm in a Multimode Microplate Reader. The fluorescence of cellular uptake is expressed as fluorescence intensity per mg of total cellular protein (protein concentration were determined using Bradford protein assay). All experiments were repeated at least three times and always performed in triplicate.

### Cell viability analysis

MTT assay was used to assess cell viability. Briefly, cells ( $4 \times 10^4$  cells) were seeded in one well of 96-well plates and cultivated in an RPMI-1640 medium for 24 h. Cells were washed with PBS and then adding different

concentrations of supplements with a serum-free medium, incubated for 2 h at 37°C and washed with PBS twice, then incubated with fresh medium containing serum for 24 h. Then, 20 µl of MTT (5.5 mg/ml) in serum-free media was added directly to each well and incubated for 4 h at 37°C. Removing the supernatant and then adding 100 µl of DMSO, and incubated at 37°C for another 30 min before quantifying the absorbance at 550 nm.

### Statistical analysis

All experiments were performed at least three times and all results are expressed as means ± standard deviation (SD). Statistical significance between groups was calculated using SPSS software. A student's *t*-test was used for data analysis and *p* value < 0.05 was taken as the level of statistically significant.

### ACKNOWLEDGMENTS AND FUNDING

We are thankful for the National Nature Science Foundation of China grant (NO. 81501330), and Science Foundation of CTGU grant (KJ2014B066).

### CONFLICTS OF INTEREST

The authors indicate no potential conflicts of interest.

### REFERENCES

1. Shi NQ, Qi XR, Xiang B, Zhang Y. A survey on “Trojan Horse” peptides: opportunities, issues and controlled entry to “Troy”. *J Control Release*. 2014; 194:53–70.
2. Liu H, Zeng F, Zhang M, Huang F, Wang J, Guo J, Liu C, Wang H. Emerging landscape of cell penetrating peptide in reprogramming and gene editing. *J Control Release*. 2016; 226:124–137.
3. Peluffo H, Unzueta U, Negro-Demontel ML, Xu Z, Vaquez E, Ferrer-Miralles N, Villaverde A. BBB-targeting, protein-based nanomedicines for drug and nucleic acid delivery to the CNS. *Biotechnol Adv*. 2015; 33:277–287.
4. Milletti F. Cell-penetrating peptides: classes, origin, and current landscape. *Drug Discov Today*. 2012; 17:850–860.
5. Kim HJ, Kim MH, Kim JT, Lee WJ, Kim E, Lim KS, Kim JK, Yang YI, Park KD, Kim YH. Intracellular transduction of TAT-Hsp27 fusion protein enhancing cell survival and regeneration capacity of cardiac stem cells in acute myocardial infarction. *J Control Release*. 2015; 215:55–72.
6. Huang X, Hu Q, Braun GB, Pallaoro A, Morales DP, Zasadzinski J, Clegg DO, Reich NO. Light-activated RNA interference in human embryonic stem cells. *Biomaterials*. 2015; 63:70–79.
7. Peng LH, Niu J, Zhang CZ, Yu W, Wu JH, Shan YH, Wang XR, Shen YQ, Mao ZW, Liang WQ, et al. TAT conjugated cationic noble metal nanoparticles for gene delivery to epidermal stem cells. *Biomaterials*. 2014; 35:5605–5618.

8. Peitz M, Munst B, Thummer RP, Helfen M, Edenhofer F. Cell-permeant recombinant Nanog protein promotes pluripotency by inhibiting endodermal specification. *Stem Cell Res*. 2014; 12:680–689.
9. Mirakhori F, Zeynali B, Rassouli H, Salekdeh GH, Baharvand H. Direct conversion of human fibroblasts into dopaminergic neural progenitor-like cells using TAT-mediated protein transduction of recombinant factors. *Biochem Biophys Res Commun*. 2015; 459:655–661.
10. Pan C, Jia W, Lu B, Bishop CE. Expression of TAT recombinant Oct4, Sox2, Lin28, and Nanog proteins from baculovirus-infected Sf9 insect cells. *Gene*. 2015; 556:245–248.
11. Wang H, Zhong CY, Wu JF, Huang YB, Liu CB. Enhancement of TAT cell membrane penetration efficiency by dimethyl sulphoxide. *J Control Release*. 2010; 143:64–70.
12. Ma JL, Wang H, Wang YL, Luo YH, Liu CB. Enhanced Peptide delivery into cells by using the synergistic effects of a cell-penetrating Peptide and a chemical drug to alter cell permeability. *Mol Pharm*. 2015; 12:2040–2048.
13. D’Astolfo DS, Pagliero RJ, Pras A, Karthaus WR, Clevers H, Prasad V, Lebbink RJ, Rehmann H, Geijsen N. Efficient intracellular delivery of native proteins. *Cell*. 2015; 161:674–690.
14. Vives E, Schmidt J, Pelegrin A. Cell-penetrating and cell-targeting peptides in drug delivery. *Biochim Biophys Acta*. 2008; 1786:126–138.
15. Abes S, Williams D, Prevot P, Thierry A, Gait MJ, Lebleu B. Endosome trapping limits the efficiency of splicing correction by PNA-oligolysine conjugates. *J Control Release*. 2006; 110:595–604.
16. Ciftci K, Levy RJ. Enhanced plasmid DNA transfection with lysosomotropic agents in cultured fibroblasts. *Int J Pharm*. 2001; 218:81–92.
17. Bobick BE, Alexander PG, Tuan RS. High efficiency transfection of embryonic limb mesenchyme with plasmid DNA using square wave pulse electroporation and sucrose buffer. *Biotechniques*. 2014; 56:85–89.
18. Diringner MN. The Evolution of the Clinical Use of Osmotic Therapy in the Treatment of Cerebral Edema. *Acta Neurochir Suppl*. 2016; 121:3–6.
19. Raucher D, Ryu JS. Cell-penetrating peptides: strategies for anticancer treatment. *Trends Mol Med*. 2015; 21:560–570.
20. Xiong J, Wang H, Guo G, Wang S, He L, Chen H, Wu J. Male germ cell apoptosis and epigenetic histone modification induced by *Tripterygium wilfordii* Hook F. *PLoS One*. 2011; 6:e20751.
21. Wang H, Jiang M, Bi H, Chen X, He L, Li X, Wu J. Conversion of female germline stem cells from neonatal and prepubertal mice into pluripotent stem cells. *J Mol Cell Biol*. 2014; 6:164–171.
22. Wang H, Shi L, Xiang J, Ding X, Luo H, Wang S, Wu J. Isolation, culture and transplantation of female germline stem cells from neonatal and prepubertal mice. *Protoco Exch*. 2013; doi: 10.1038/protex.2013.004.
